# Supplementary material for: Breakdown of brain–body allometry and the encephalization of birds and mammals
Source: Springer Nature journal article supplement (doi:10.1038/s41559-018-0632-1), 2018-08-09
Supplement: 41559_2018_632_MOESM1_ESM.pdf [file 41559_2018_632_MOESM1_ESM.pdf]

In the format provided by the authors and unedited.

# Breakdown of brain–body allometry and the encephalization of birds and mammals

Masahito Tsuboi <sup>1,2,3\*</sup>, Wouter van der Bijl <sup>2</sup>, Bjørn Tore Kopperud<sup>1</sup>, Johannes Erritzøe<sup>4</sup>, Kjetil L. Voje<sup>1</sup>, Alexander Kotrschal <sup>2</sup>, Kara E. Yopak<sup>5,6</sup>, Shaun P. Collin<sup>6</sup>, Andrew N. Iwaniuk <sup>7</sup> and Niclas Kolm <sup>2</sup>

---

<sup>1</sup>Centre for Ecological and Evolutionary Synthesis (CEES), Department of Biology, University of Oslo, Oslo, Norway. <sup>2</sup>Department of Zoology/Ethology, Stockholm University, Stockholm, Sweden. <sup>3</sup>Department of Evolutionary Studies of Biosystems, The Graduate University of Advanced Studies, Hayama, Kanagawa, Japan. <sup>4</sup>House of Bird Research, Taps, Christiansfeld, Denmark. <sup>5</sup>Department of Biology and Marine Biology, UNCW Center for Marine Science, University of North Carolina Wilmington, Wilmington, NC, USA. <sup>6</sup>Oceans Graduate School and the Oceans Institute, The University of Western Australia, Crawley, Western Australia, Australia. <sup>7</sup>Department of Neuroscience, University of Lethbridge, Lethbridge, Alberta, Canada. \*e-mail: [masahito.tsuboi@ibv.uio.no](mailto:masahito.tsuboi@ibv.uio.no)

## Supplementary Information

### Breakdown of brain-body allometry and the encephalization of birds and mammals

Masahito Tsuboi<sup>1,2,3</sup>, Wouter van der Bijl<sup>2</sup>, Bjørn Tore Kopperud<sup>1</sup>, Johannes Erritzøe<sup>4</sup>, Kjetil L. Voje<sup>1</sup>, Alexander Kotrschal<sup>2</sup>, Kara E. Yopak<sup>5,6</sup>, Shaun P. Collin<sup>6</sup>, Andrew Iwaniuk<sup>7</sup>, and Niclas Kolm<sup>2</sup>

#### TABLE OF CONTENTS

|                                |   |
|--------------------------------|---|
| Supplementary Figure 1-3 ..... | 1 |
| Supplementary Table 1-7.....   | 4 |

**Affiliations:** 1. Centre for Ecological and Evolutionary Synthesis (CEES) & Evogene, Department of Biology, University of Oslo, Blindernveien 31, 0371 Oslo, Norway 2. Department of Zoology/Ethology, Stockholm University, Svante Arrhenius väg 18b, 10691 Stockholm, Sweden 3. Department of Evolutionary Studies of Biosystems, The Graduate University of Advanced Studies, Shonan Village, Hayama 240 0193 Kanagawa, Japan 4. House of Bird Research, Taps, 6070 Christiansfeld, Denmark 5. Department of Biology and Marine Biology, UNCW Center for Marine Science, University of North Carolina Wilmington, 601 S. College Road, Wilmington, NC 28403, U.S.A. 6. Oceans Graduate School and the Oceans Institute, The University of Western Australia, Crawley, WA 6009, Australia 7. Department of Neuroscience, University of Lethbridge, 4401 University Drive, Lethbridge, Alberta T1K 3M4, Canada

**Corresponding author:** Masahito Tsuboi (masahito.tsuboi@ibv.uio.no)

## Supplementary Figure 1-3

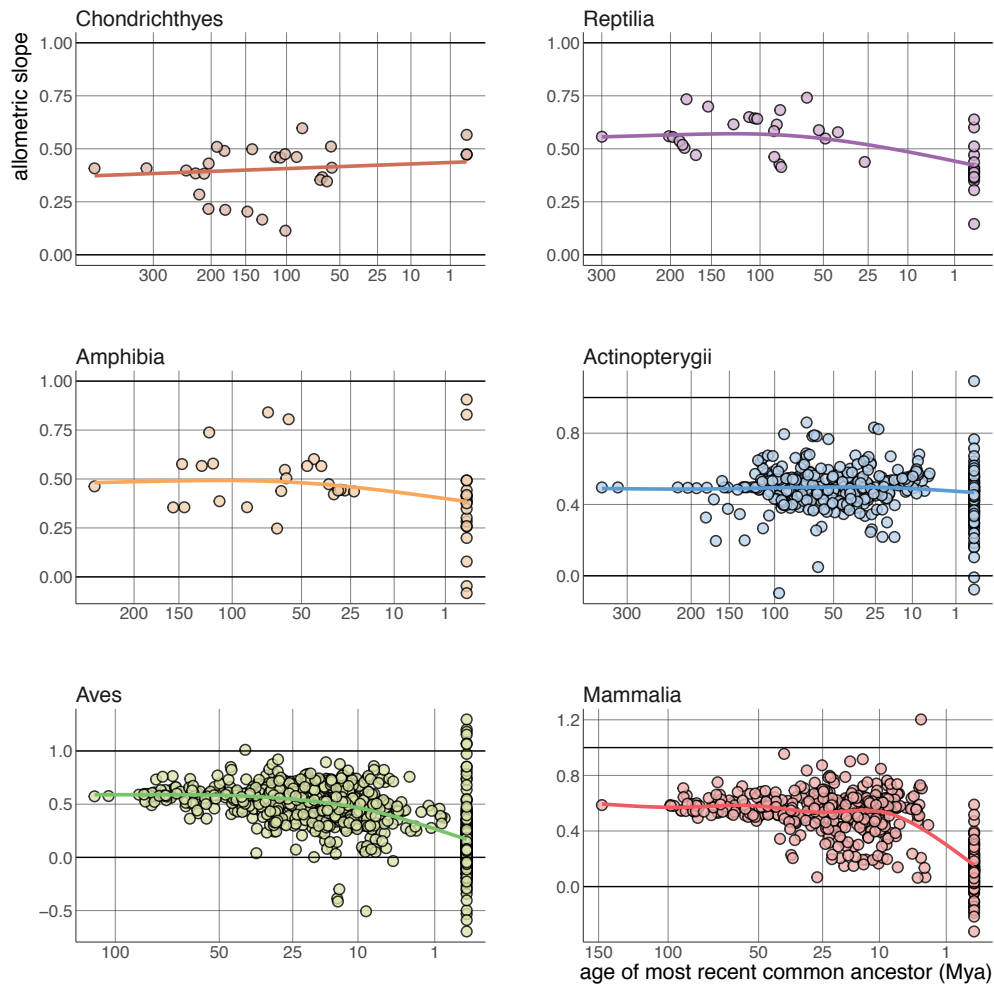

**Supplementary Figure 1 | Brain-body allometry through time.** Plots show evolutionary allometric slope estimated from phylogenetic generalized least squares at all nodes with  $\geq 6$  descendants plotted against the node age (Mya) for Chondrichthyes (brown), 'Reptilia' (e.g. non-avian reptiles, purple), Amphibia (orange), Actinopterygii (blue), Aves (green) and Mammalia (red). At present (right end of each panel), the plot shows within-species (static) allometric slopes estimated for species with  $\geq 10$  individual observations controlling for sex and method of brain size measurement (i.e. volume or mass). Trends for each class are represented by penalized thin-plate regression splines.

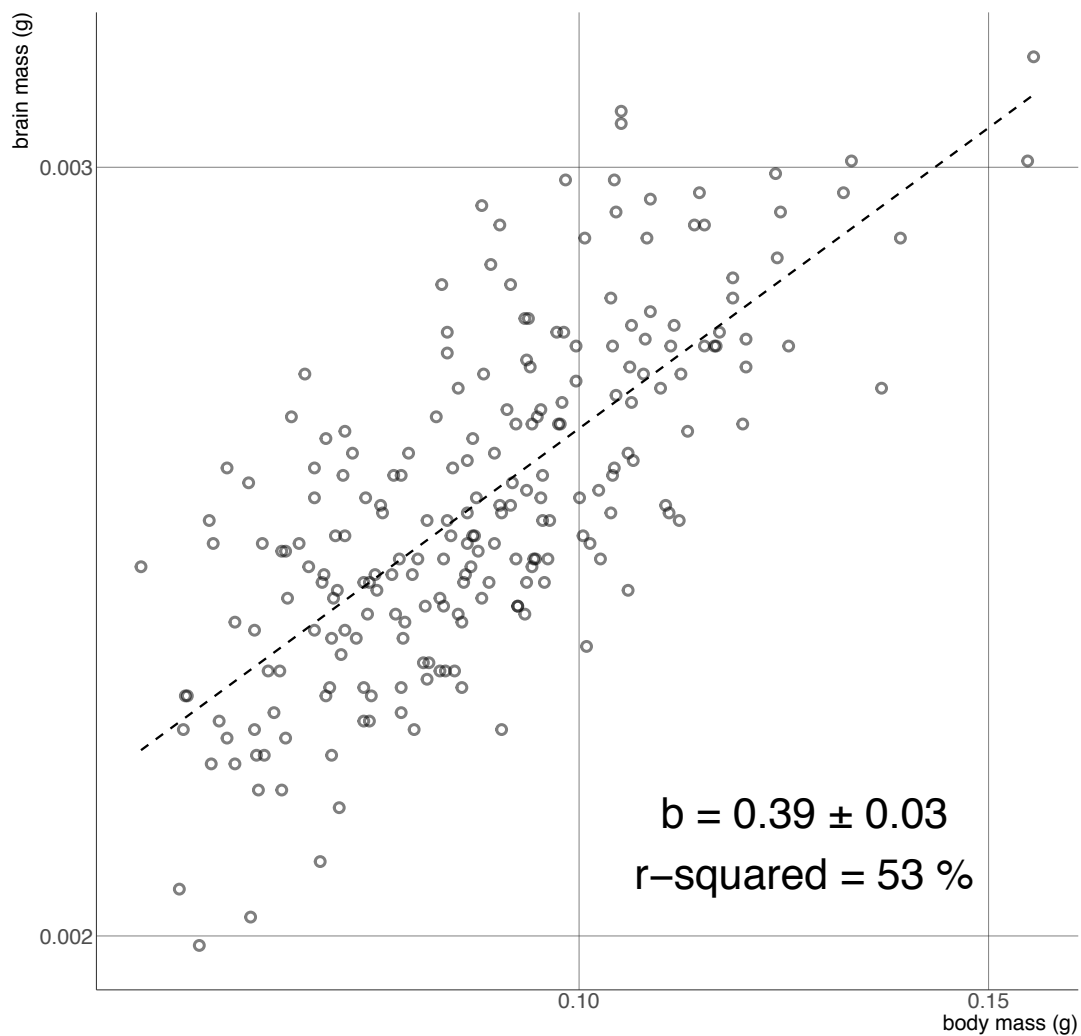

**Supplementary Figure 2 | The strict-sense static allometry of male guppy *Poecilia reticulata*.** Plot shows a relationship between  $\log_{10}$  brain mass (g) against  $\log_{10}$  body mass (g) of 218 adult male individuals. Animals were reared in the lab as described in (Kotrschal *et al.* 2013). This dataset only includes individuals of between 111 and 119 days old, thus representing the static allometry in a strict sense. The slope  $0.39 \pm 0.03$  (slope  $\pm$  standard error) is substantially steeper than the averages of the static slopes in mammals and birds (Supplementary Table 1). It indicates that the differences in static slopes among classes are not an artifact of the extended age and size range of species with indeterminate growth compared to determinate growth.

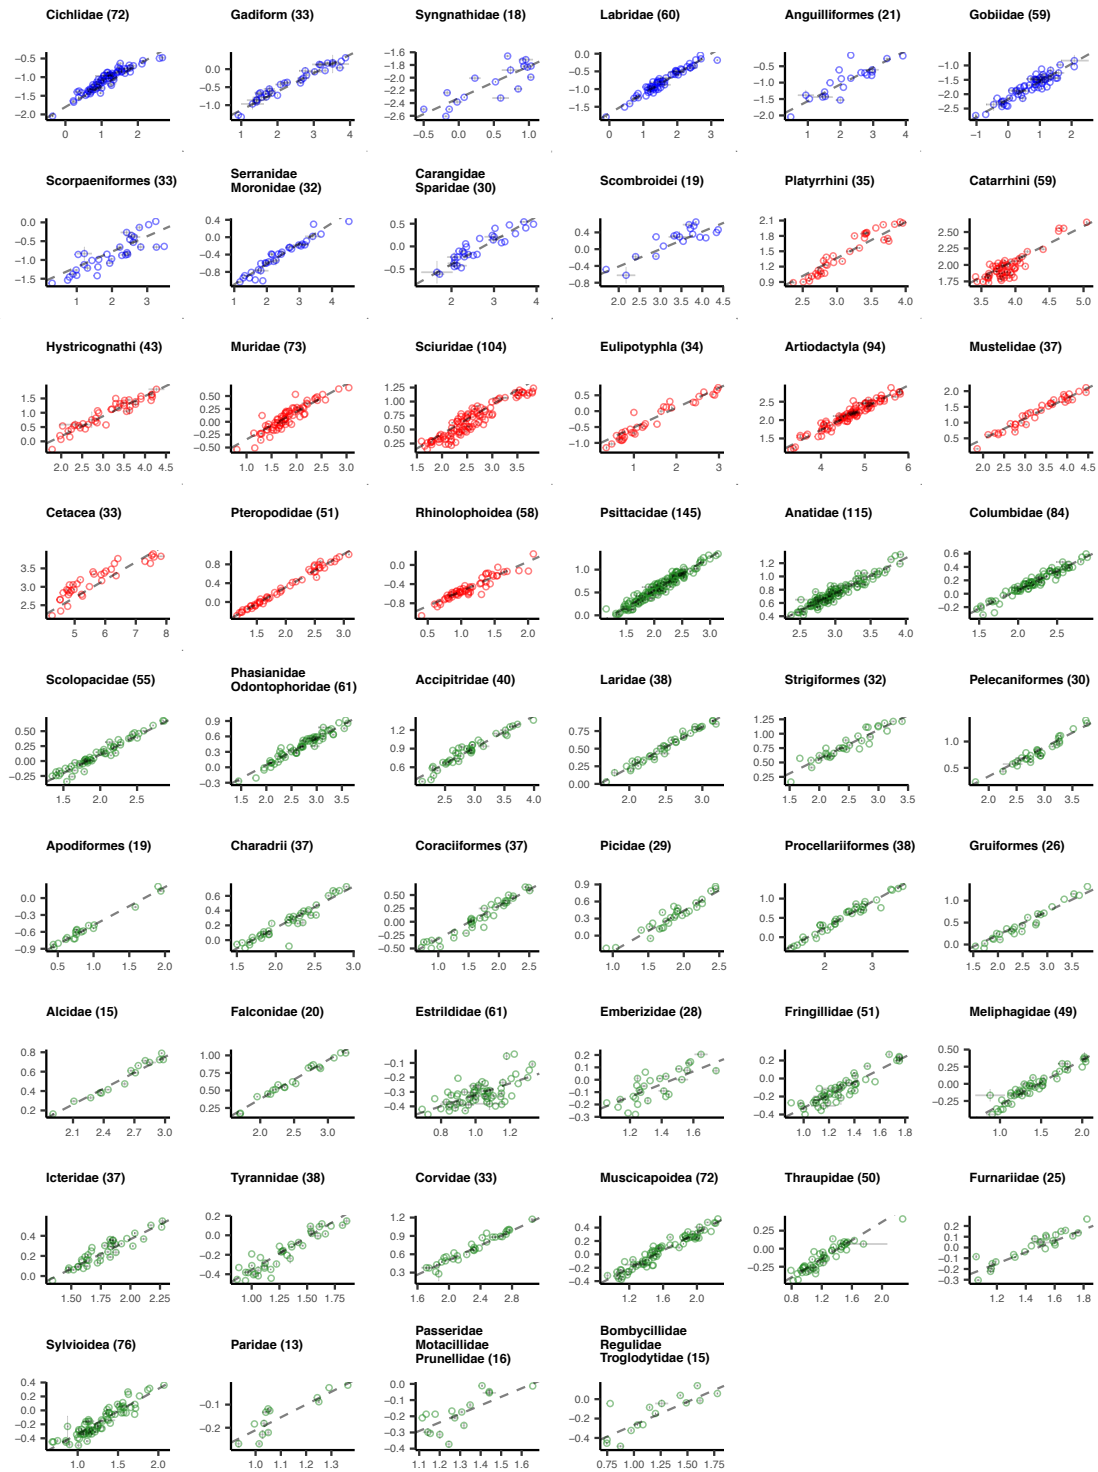

**Supplementary Figure 3 | Brain-body allometry of 52 selected vertebrate clades.** Plots show the relationship between  $\log_{10}$  brain mass (g) and  $\log_{10}$  body mass (g) of 52 vertebrate taxa. Numbers next to taxa names indicate sample size (number of species). Three classes are shown in different colors; Teleost: blue, Mammalia: red, Aves: green. Dashed lines are evolutionary allometry estimated by *SLOUCH* analyses (Supplementary Table 3). Error bars are standard errors of mean  $\log_{10}$  body mass and  $\log_{10}$  brain mass. Groups represented by multiple family names indicate that these families were treated as one group to allow estimating the evolutionary parameters while maximizing the number of included taxa in which within-species variance is available.

## Supplementary Table 1-7

## Supplementary Table 1 | Brain-body allometry at each taxonomic rank.

|                    | Evolutionary allometry<br>(slope $\pm$ s.e.) |                      |                      |                      | Static allometry<br>(slope $\pm$ s.e.) |
|--------------------|----------------------------------------------|----------------------|----------------------|----------------------|----------------------------------------|
|                    | Class                                        | Order                | Family               | Genus                | Species                                |
| Mammalia           | 0.59 $\pm$ 0.01                              | 0.58 $\pm$ 0.03 (13) | 0.55 $\pm$ 0.03 (48) | 0.51 $\pm$ 0.03 (34) | 0.13 $\pm$ 0.01 (110)                  |
| Aves               | 0.57 $\pm$ 0.01                              | 0.57 $\pm$ 0.02 (22) | 0.56 $\pm$ 0.01 (67) | 0.42 $\pm$ 0.04 (40) | 0.14 $\pm$ 0.02 (213)                  |
| Actinopterygii     | 0.50 $\pm$ 0.01                              | 0.51 $\pm$ 0.03 (13) | 0.49 $\pm$ 0.02 (29) | 0.50 $\pm$ 0.03 (18) | 0.44 $\pm$ 0.02 (90)                   |
| Amphibia           | 0.46 $\pm$ 0.03                              | 0.49 $\pm$ 0.09 (2)  | 0.52 $\pm$ 0.11 (4)  | 0.51 (1)             | 0.36 $\pm$ 0.05 (20)                   |
| Non-avian Reptilia | 0.56 $\pm$ 0.02                              | 0.56 (1)             | 0.62 $\pm$ 0.03 (4)  | 0.57 (1)             | 0.41 $\pm$ 0.03 (16)                   |
| Chondrichthyes     | 0.41 $\pm$ 0.02                              | 0.31 $\pm$ 0.04 (4)  | 0.45 $\pm$ 0.15 (2)  | 0.43 (1)             | 0.50 $\pm$ 0.03 (3)                    |

Table shows average allometric slopes at each taxonomic level (i.e. Class, Order, Family, Genus, Species) for six vertebrate clades. The across-species (evolutionary) allometric slopes were estimated with generalized least squares with residual variance modeled as Brownian motion with phylogenetic heritability ( $\lambda$ , Lynch 1991). Numbers in parenthesis represent the number of clade at each taxonomic scale with  $\geq 6$  species. The within-species (static) allometric slopes were estimated with ordinary least squares controlling for sex and methods for brain size measurement (i.e. either volume or mass), and numbers in parenthesis represent the number of species with  $\geq 10$  individuals. Note that standard error of allometric slope represents the estimated standard errors (s.e.) from the generalized least squares at the Class level, whereas the rest indicates the s.e. across all slopes estimated at the respective taxonomic level.

**Supplementary Table 2 | Summary of bias in allometric slope due to measurement error**

|                    | Reliability ratio<br>( $k \pm$ s.e.) |                        |                        |                        | Error variance<br>(CV $\pm$ s.e.) |
|--------------------|--------------------------------------|------------------------|------------------------|------------------------|-----------------------------------|
|                    | Class                                | Order                  | Family                 | Genus                  | Species                           |
| Mammalia           | 0.998                                | 0.994 $\pm$ 0.001 (5)  | 0.958 $\pm$ 0.019 (15) | 0.827 $\pm$ 0.049 (9)  | 46.5 $\pm$ 4.6 (70)               |
| Aves               | 0.997                                | 0.992 $\pm$ 0.001 (17) | 0.981 $\pm$ 0.003 (44) | 0.938 $\pm$ 0.012 (25) | 37.2 $\pm$ 3.3 (143)              |
| Actinopterygii     | 0.973                                | 0.967 $\pm$ 0.008 (6)  | 0.940 $\pm$ 0.013 (14) | 0.852 $\pm$ 0.053 (4)  | 28.1 $\pm$ 2.8 (62)               |
| Amphibia           | 0.991                                | 0.989 $\pm$ 0.004 (2)  | 0.986 $\pm$ 0.004 (4)  | 0.984 (1)              | 20.9 $\pm$ 5.7 (13)               |
| Non-avian Reptilia | 0.998                                | 0.997 (1)              | 0.994 (1)              | -                      | 17.6 $\pm$ 4.6 (4)                |
| Chondrichthyes     | 0.941                                | 0.945 (1)              | -                      | -                      | -                                 |

Table shows the reliability ratio (Hansen and Bartoszek 2012),  $k$ , averaged over all taxonomic units at each taxonomic rank for evolutionary allometries and the amount of error variance in body size that is necessary to generate observed static allometric slope when true slope equals the evolutionary allometric slope at the selected group level (Supplementary Table 3) for static allometries. Error variance is expressed as the coefficient of variation (CV, %). Numbers in parenthesis represent the number of clades or species examined at each taxonomic scale.

Supplementary Table 3 | Summary of OU model parameters estimated by *SLOUCH* analyses

| Group (N)                                      | Root age (mya) | Phylogenetic half-life (support region) | Stationary variance (support region) | Evolutionary allometry (slope $\pm$ s.e.) | $r^2$ (%) |
|------------------------------------------------|----------------|-----------------------------------------|--------------------------------------|-------------------------------------------|-----------|
| <b>Teleostei</b>                               |                |                                         |                                      |                                           |           |
| Cichlidae (72)                                 | 71.4           | 1.598 (0.245 - $\infty$ )               | 0.037 (0.008 - 0.069)                | 0.564 $\pm$ 0.022                         | 90.3      |
| Gadiformes (33)                                | 70.0           | $\infty$ (0.408 - $\infty$ )            | 0.073 (0.008 - 0.167)                | 0.512 $\pm$ 0.027                         | 93.7      |
| Syngnathidae (18)                              | 96.9           | 0.025 (0.000 - 0.384)                   | 0.024 (0.012 - 0.051)                | 0.502 $\pm$ 0.075                         | 70.7      |
| Labridae (60)                                  | 82.8           | 0.008 (0.000 - 0.050)                   | 0.005 (0.003 - 0.009)                | 0.563 $\pm$ 0.018                         | 94.7      |
| Anguilliformes (21)                            | 101.8          | 0.000 (0.000 - 0.051)                   | 0.048 (0.024 - 0.102)                | 0.512 $\pm$ 0.060                         | 75.0      |
| Gobiidae (59)                                  | 75.6           | 0.270 (0.000 - $\infty$ )               | 0.018 (0.011 - 0.039)                | 0.617 $\pm$ 0.032                         | 85.4      |
| Scorpaeniformes (33)                           | 120.0          | 0.917 (0.204 - $\infty$ )               | 0.064 (0.031 - 0.918)                | 0.411 $\pm$ 0.040                         | 76.0      |
| Serranidae & Moronidae (32)                    | 106.5          | 0.094 (0.000 - $\infty$ )               | 0.009 (0.004 - 0.032)                | 0.471 $\pm$ 0.026                         | 91.0      |
| Carangidae & Sparidae (30)                     | 115.2          | 9.796 (0.204 - $\infty$ )               | 0.043 (0.004 - 0.193)                | 0.524 $\pm$ 0.036                         | 87.6      |
| Scombroidei (19)                               | 116.4          | 0.400 (0.204 - $\infty$ )               | 0.024 (0.020 - 0.653)                | 0.415 $\pm$ 0.054                         | 74.6      |
| <b>Mammalia</b>                                |                |                                         |                                      |                                           |           |
| Platyrrhini (35)                               | 23.2           | 10.00 (0.612 - $\infty$ )               | 0.102 (0.012 - 0.180)                | 0.701 $\pm$ 0.068                         | 74.4      |
| Catarrhini (59)                                | 34.4           | 0.748 (0.408 - $\infty$ )               | 0.010 (0.006 - 0.153)                | 0.516 $\pm$ 0.044                         | 69.4      |
| Hystricognathi (43)                            | 45.8           | 0.000 (0.000 - $\infty$ )               | 0.025 (0.016 - 0.043)                | 0.703 $\pm$ 0.039                         | 89.2      |
| Muridae (73)                                   | 48.1           | 0.94 (0.408 - $\infty$ )                | 0.014 (0.008 - 0.155)                | 0.537 $\pm$ 0.030                         | 80.2      |
| Sciuridae (104)                                | 41.5           | 0.197 (0.122 - 0.384)                   | 0.008 (0.006 - 0.013)                | 0.523 $\pm$ 0.025                         | 80.9      |
| Cricetidae (58)                                | 48.1           | 0.727 (0.200 - $\infty$ )               | 0.010 (0.005 - 0.019)                | 0.524 $\pm$ 0.028                         | 85.4      |
| Eulipotyphla (34)                              | 82.5           | 9.592 (0.612 - $\infty$ )               | 0.147 (0.016 - 0.294)                | 0.623 $\pm$ 0.040                         | 87.2      |
| Artiodactyla (94)                              | 70.7           | 0.621 (0.253 - $\infty$ )               | 0.015 (0.008 - 0.243)                | 0.607 $\pm$ 0.020                         | 90.6      |
| Mustelidae (37)                                | 24.1           | 0.722 (0.204 - $\infty$ )               | 0.015 (0.010 - 0.214)                | 0.650 $\pm$ 0.036                         | 89.7      |
| Cetacea (33)                                   | 52.2           | $\infty$ (0.894 - $\infty$ )            | 0.180 (0.024 - 0.310)                | 0.480 $\pm$ 0.027                         | 90.7      |
| Pteropodidae (51)                              | 25.1           | 0.053 (0.000 - 0.226)                   | 0.002 (0.001 - 0.003)                | 0.702 $\pm$ 0.013                         | 98.4      |
| Rhinolophoidea (58)                            | 61.8           | 10.00 (0.816 - $\infty$ )               | 0.045 (0.006 - 0.076)                | 0.618 $\pm$ 0.028                         | 90.5      |
| <b>Aves</b>                                    |                |                                         |                                      |                                           |           |
| Psittacidae (145)                              | 45.7           | 0.021 (0.000 - 0.163)                   | 0.005 (0.004 - 0.007)                | 0.728 $\pm$ 0.016                         | 93.6      |
| Anatidae (115)                                 | 32.1           | 0.014 (0.010 - 0.051)                   | 0.003 (0.002 - 0.004)                | 0.530 $\pm$ 0.016                         | 89.8      |
| Columbidae (84)                                | 36.3           | 0.172 (0.000 - 0.531)                   | 0.002 (0.002 - 0.004)                | 0.566 $\pm$ 0.020                         | 90.8      |
| Estrildidae (61)                               | 14.1           | 0.124 (0.000 - 0.633)                   | 0.004 (0.003 - 0.007)                | 0.394 $\pm$ 0.057                         | 40.6      |
| Emberizidae (28)                               | 15.2           | $\infty$ (0.612 - $\infty$ )            | 0.041 (0.006 - 0.073)                | 0.514 $\pm$ 0.075                         | 61.1      |
| Scolopacidae (55)                              | 38.1           | 2.309 (0.324 - $\infty$ )               | 0.009 (0.003 - 0.054)                | 0.622 $\pm$ 0.028                         | 89.8      |
| Phasianidae & Odontophoridae (61)              | 30.7           | 0.171 (0.000 - 1.071)                   | 0.004 (0.002 - 0.008)                | 0.516 $\pm$ 0.019                         | 91.2      |
| Fringillidae (51)                              | 27.4           | 0.087 (0.000 - 0.265)                   | 0.004 (0.002 - 0.006)                | 0.708 $\pm$ 0.045                         | 82.4      |
| Meliphagidae (49)                              | 30.5           | 0.000 (0.000 - 0.337)                   | 0.003 (0.002 - 0.005)                | 0.658 $\pm$ 0.028                         | 91.6      |
| Laridae (38)                                   | 17.3           | 0.063 (0.000 - 0.269)                   | 0.001 (0.001 - 0.003)                | 0.575 $\pm$ 0.023                         | 94.1      |
| Icteridae (37)                                 | 14.3           | 0.431 (0.000 - $\infty$ )               | 0.003 (0.002 - 0.008)                | 0.587 $\pm$ 0.039                         | 85.7      |
| Accipitridae (40)                              | 56.0           | 0.135 (0.036 - 0.343)                   | 0.004 (0.002 - 0.007)                | 0.514 $\pm$ 0.025                         | 91.4      |
| Tyrannidae (38)                                | 33.2           | 0.571 (0.000 - $\infty$ )               | 0.006 (0.003 - 0.014)                | 0.670 $\pm$ 0.054                         | 79.7      |
| Corvidae (33)                                  | 26.4           | 2.245 (0.204 - $\infty$ )               | 0.008 (0.002 - 0.030)                | 0.600 $\pm$ 0.041                         | 86.9      |
| Muscicapioidea (72)                            | 29.0           | 0.000 (0.000 - 0.008)                   | 0.004 (0.003 - 0.006)                | 0.662 $\pm$ 0.023                         | 91.9      |
| Strigiformes (32)                              | 77.6           | 0.041 (0.000 - 0.220)                   | 0.008 (0.005 - 0.014)                | 0.505 $\pm$ 0.034                         | 87.2      |
| Pelecaniformes (30)                            | 70.8           | 0.596 (0.082 - $\infty$ )               | 0.004 (0.002 - 0.011)                | 0.551 $\pm$ 0.031                         | 91.4      |
| Apodiformes (19)                               | 62.2           | 0.313 (0.000 - $\infty$ )               | 0.002 (0.001 - 0.008)                | 0.677 $\pm$ 0.029                         | 96.5      |
| Charadrii (37)                                 | 44.0           | 0.232 (0.061 - $\infty$ )               | 0.002 (0.001 - 0.006)                | 0.561 $\pm$ 0.026                         | 92.7      |
| Coraciiformes (37)                             | 82.8           | 0.213 (0.082 - 0.980)                   | 0.006 (0.004 - 0.018)                | 0.614 $\pm$ 0.030                         | 91.9      |
| Picidae (29)                                   | 28.0           | $\infty$ (0.498 - $\infty$ )            | 0.069 (0.008 - 0.127)                | 0.715 $\pm$ 0.048                         | 88.7      |
| Thraupidae (50)                                | 15.0           | 0.126 (0.000 - 1.071)                   | 0.004 (0.003 - 0.009)                | 0.637 $\pm$ 0.033                         | 83.9      |
| Furnariidae (25)                               | 20.7           | 9.796 (0.000 - $\infty$ )               | 0.024 (0.002 - 0.048)                | 0.527 $\pm$ 0.042                         | 87.0      |
| Procellariiformes (38)                         | 62.7           | 0.000 (0.000 - 0.224)                   | 0.007 (0.005 - 0.012)                | 0.681 $\pm$ 0.022                         | 96.0      |
| Gruiformes (26)                                | 51.4           | 1.071 (0.127 - $\infty$ )               | 0.011 (0.005 - 0.149)                | 0.536 $\pm$ 0.033                         | 90.9      |
| Alcidae (15)                                   | 14.8           | $\infty$ (0.204 - $\infty$ )            | 0.008 (0.001 - 0.021)                | 0.545 $\pm$ 0.027                         | 96.5      |
| Falconidae (20)                                | 43.3           | 0.115 (0 - 2.939)                       | 0.001 (0.001 - 0.010)                | 0.557 $\pm$ 0.022                         | 97.0      |
| Sylvioidea (76)                                | 54.1           | 0.411 (0.200 - $\infty$ )               | 0.006 (0.004 - 0.015)                | 0.647 $\pm$ 0.036                         | 82.7      |
| Paridae (13)                                   | 18.9           | 1.192 (0.200 - $\infty$ )               | 0.002 (0.001 - 0.030)                | 0.553 $\pm$ 0.080                         | 78.7      |
| Passeridae & Motacillidae & Prunellidae (16)   | 35.7           | 0.289 (0.200 - $\infty$ )               | 0.004 (0.002 - 0.017)                | 0.527 $\pm$ 0.089                         | 67.4      |
| Bombycillidae & Regulidae & Troglodytidae (15) | 43.4           | 0.254 (0.200 - $\infty$ )               | 0.012 (0.006 - 0.046)                | 0.479 $\pm$ 0.093                         | 64.1      |

Table shows the phylogenetic half-life ( $\ln 2/\alpha$ ) in units of tree length scaled to the total height of one, the stationary variance ( $\sigma^2/2\alpha$ ) in units of  $(\log_{10} \text{ brain mass (g)})^2$ , evolutionary allometric slope and  $r^2$  of each group estimated by *SLOUCH* analyses where OU model was fitted to the residual variance of a linear model:  $\log_{10} \text{ brain mass (g)} \sim \log_{10} \text{ body mass (g)}$ . Support regions shown in parenthesis represents the range of parameter within 2 maximum-likelihood (ML) units from the ML estimates. All parameters are accounted for by measurement errors in both brain and body mass. Root age (mya) of each groups are also shown. Groups represented by multiple family names indicate that these families were treated as one group to allow for the estimation of the evolutionary parameters, while maximizing the number of included taxa in which within-species variance is available.



**Supplementary Table 4 | Results of *SLOUCH* analyses relating within- and among-species variance in relative brain size**

| Predictor variables                      | N         | Intercept $\pm$ s.e.              | Slope $\pm$ s.e.                     |                                   | $r^2$ (%)   | AICc          |
|------------------------------------------|-----------|-----------------------------------|--------------------------------------|-----------------------------------|-------------|---------------|
| <i>(Mammalia)</i>                        |           |                                   |                                      |                                   |             |               |
|                                          |           |                                   | Root age                             | $C_{brain}$                       |             |               |
| Root age                                 | 9         | 0.100 $\pm$ 0.027                 | 0.0006 $\pm$ 0.0005                  | -                                 | 17.7        | -19.2         |
| <b><math>C_{brain}</math></b>            | <b>9</b>  | <b>0.082<math>\pm</math>0.023</b> | -                                    | <b>7.23<math>\pm</math>3.43</b>   | <b>42.9</b> | <b>-21.2</b>  |
| $C_{brain}$ + Root age                   | 9         | 0.013 $\pm$ 0.021                 | 0.0009 $\pm$ 0.0003                  | 11.08 $\pm$ 2.03                  | 86.8        | -16.3         |
|                                          |           |                                   | Root age                             | $\Delta_{slope}$                  |             |               |
| <b>Root age</b>                          | <b>12</b> | <b>0.073<math>\pm</math>0.031</b> | <b>0.0008<math>\pm</math>0.0006</b>  | -                                 | <b>15.7</b> | <b>-31.0</b>  |
| $\Delta_{slope}$                         | 12        | 0.083 $\pm$ 0.047                 | -                                    | 0.059 $\pm$ 0.096                 | 4.0         | -29.8         |
| $\Delta_{slope}$ + Root age              | 12        | 0.039 $\pm$ 0.005                 | 0.0008 $\pm$ 0.0006                  | 0.069 $\pm$ 0.082                 | 20.4        | -25.2         |
| <i>(Aves)</i>                            |           |                                   |                                      |                                   |             |               |
|                                          |           |                                   | Root age                             | $C_{brain}$                       |             |               |
| Root age                                 | 31        | 0.050 $\pm$ 0.006                 | 0.0003 $\pm$ 0.0001                  | -                                 | 15.3        | -160.5        |
| $C_{brain}$                              | 31        | 0.045 $\pm$ 0.004                 | -                                    | 2.97 $\pm$ 0.49                   | 20.8        | -162.6        |
| <b><math>C_{brain}</math> + Root age</b> | <b>31</b> | <b>0.029<math>\pm</math>0.006</b> | <b>0.0004<math>\pm</math>0.0001</b>  | <b>3.23<math>\pm</math>0.43</b>   | <b>39.4</b> | <b>-168.3</b> |
|                                          |           |                                   | Root age                             | $\Delta_{slope}$                  |             |               |
| $\Delta_{slope}$                         | 31        | 0.079 $\pm$ 0.005                 | -                                    | -0.033 $\pm$ 0.005                | 0.3         | -155.2        |
| $\Delta_{slope}$ + Root age              | 31        | 0.080 $\pm$ 0.006                 | 0.0003 $\pm$ 0.0001                  | -0.061 $\pm$ 0.007                | 16.4        | -158.3        |
| <i>(Teleostei)</i>                       |           |                                   |                                      |                                   |             |               |
|                                          |           |                                   | Root age                             | $C_{brain}$                       |             |               |
| <b>Root age</b>                          | <b>10</b> | <b>0.131<math>\pm</math>0.081</b> | <b>-0.0001<math>\pm</math>0.0009</b> | -                                 | <b>0.2</b>  | <b>-12.6</b>  |
| $C_{brain}$                              | 10        | 0.113 $\pm$ 0.042                 | -                                    | 0.68 $\pm$ 4.25                   | 0.3         | -12.6         |
| $C_{brain}$ + Root age                   | 10        | 0.120 $\pm$ 0.107                 | -0.0001 $\pm$ 0.001                  | 0.79 $\pm$ 3.10                   | 0.3         | -3.6          |
|                                          |           |                                   | Root age                             | $\Delta_{slope}$                  |             |               |
| <b><math>\Delta_{slope}</math></b>       | <b>10</b> | <b>0.065<math>\pm</math>0.013</b> | -                                    | <b>0.430<math>\pm</math>0.104</b> | <b>66.4</b> | <b>-23.1</b>  |
| $\Delta_{slope}$ + Root age              | 10        | 0.041 $\pm$ 0.048                 | 0.00003 $\pm$ 0.0005                 | 0.719 $\pm$ 0.068                 | 67.6        | -14.5         |

Table shows the complete results testing the relationship between  $\sqrt{V_{st}}$  and predictor variables ( $C_{brain}$ ,  $\Delta_{slope}$ , and root age). Sample size (number of groups included in each model), intercept,  $r^2$ , sample size-corrected Akaike Information Criterion (AICc) and estimated slopes are presented. Estimated evolutionary parameters are accounted for by standard errors in  $C_{brain}$  and  $\Delta_{slope}$ , and by the approximate 95% confidence intervals in  $\sqrt{V_{st}}$  (see Methods for detail). The best models within each nested models, based on AICc, are shown in bold font. Phylogenetic half-lives were set to zero in these analyses, meaning that these results shown here are without controlling for phylogenetic relatedness among compared clades. See Supplementary Table 7 for results where phylogenetic relatedness was accounted for.

**Supplementary Table 5 | Phylogenetic mean and variance of conditional variance and  $\Delta$ slope**

| Trait                | Class (N)      | Root (mya) | Phylogenetic half-life (support region) | Stationary variance (support region) | Mean $\pm$ s.e.   | Tip variance (100 myr <sup>-1</sup> ) |
|----------------------|----------------|------------|-----------------------------------------|--------------------------------------|-------------------|---------------------------------------|
| Conditional variance | Mammalia (66)  | 96.1       | 0.000 (0.000 - 0.025)                   | 0.111 (0.080 - 0.161)                | 0.595 $\pm$ 0.041 | 0.115                                 |
|                      | Aves (214)     | 103.8      | 0.170 (0.112 - 0.261)                   | 0.424 (0.349 - 0.545)                | 0.563 $\pm$ 0.075 | 0.408                                 |
|                      | Teleostei (84) | 219.3      | 0.014 (0.000 - 0.033)                   | 0.501 (0.372 - 0.687)                | 0.924 $\pm$ 0.083 | 0.229                                 |
| Static slope         | Mammalia (78)  | 96.1       | 0.353 (0.061 - $\infty$ )               | 0.0073 (0.0039 - $\infty$ )          | 0.145 $\pm$ 0.021 | 0.0076                                |
|                      | Aves (214)     | 103.8      | 0.002 (0.000 - 0.018)                   | 0.0218 (0.0154 - 0.0311)             | 0.117 $\pm$ 0.013 | 0.0211                                |
|                      | Teleostei (84) | 219.3      | 0.033 (0.000 - 0.173)                   | 0.0079 (0.0048 - 0.0139)             | 0.449 $\pm$ 0.014 | 0.0036                                |
| $\Delta$ Slope       | Mammalia (78)  | 96.1       | 1.212 (0.303 - $\infty$ )               | 0.0191 (0.007 - $\infty$ )           | 0.440 $\pm$ 0.035 | 0.0199                                |
|                      | Aves (207)     | 103.8      | 0.001 (0.000 - 0.018)                   | 0.0231 (0.0162 - 0.0327)             | 0.464 $\pm$ 0.014 | 0.0222                                |
|                      | Teleostei (74) | 204.9      | 0.073 (0.021 - 0.273)                   | 0.0107 (0.0064 - 0.0190)             | 0.061 $\pm$ 0.018 | 0.0052                                |

Table shows the result of *SLOUCH* analyses fitted to three components of within-species variances in brain size shown in the first column. The phylogenetic half-life ( $\ln 2/\alpha$ ) in units of tree length scaled to the total height of one, the stationary variance ( $\sigma^2/2\alpha$ ) in units of (trait unit)<sup>2</sup>, and the phylogenetic mean (i.e. adaptive peak  $\theta$  in single-optimum OU model) are presented. Support regions shown in parenthesis represents the range of each parameter within 2 maximum-likelihood (ML) units from the ML estimates. Estimated evolutionary parameters for static slopes and  $\Delta$ slope are accounted for by standard errors in estimated allometric slopes. Tip variances are calculated as: [stationary variance  $\times$  (1 -  $e^{-\alpha 2t}$ )] and scaled to 100 millions of years according to the root age (mya) of each group.

**Supplementary Table 6 | Summary of ontogenetic allometric trajectories**

| Taxa                         | Common name           | Slope at RGP<br>± s.e. | Slope at SGP<br>± s.e. | Body mass at breakpoint<br>± s.e. |
|------------------------------|-----------------------|------------------------|------------------------|-----------------------------------|
| <b>Teleostei</b>             |                       |                        |                        |                                   |
| <i>Cyprinus carpio</i>       | Common carp           | 0.831 ± 0.023          | 0.448 ± 0.001          | 0.473 ± 0.063                     |
| <i>Pagrus major</i>          | Red seabream          | 1.018 ± 0.081          | 0.553 ± 0.012          | -1.409 ± 0.130                    |
| <b>Mammalia</b>              |                       |                        |                        |                                   |
| <i>Bos taurus</i>            | Cow                   | 0.706 ± 0.012          | 0.255 ± 0.014          | 4.303 ± 0.055                     |
| <i>Homo sapiens</i>          | Human                 | 0.937 ± 0.004          | 0.104 ± 0.017          | 3.959 ± 0.015                     |
| <i>Macropus giganteus</i>    | Eastern grey kangaroo | 0.869 ± 0.014          | 0.234 ± 0.013          | 2.980 ± 0.033                     |
| <i>Oryctolagus cuniculus</i> | European rabbit       | 0.708 ± 0.024          | 0.265 ± 0.032          | 2.545 ± 0.083                     |
| <i>Stenella coeruleoalba</i> | Striped dolphin       | 1.150 ± 0.024          | 0.198 ± 0.035          | 4.088 ± 0.039                     |
| <b>Aves</b>                  |                       |                        |                        |                                   |
| <i>Gallus gallus</i>         | Chicken               | 0.888 ± 0.031          | 0.378 ± 0.013          | 1.145 ± 0.052                     |

Table shows the ontogenetic allometric exponent of the relationship between  $\log_{10}$  brain mass against  $\log_{10}$  body mass at the rapid growth phase (RGP), slow growth phase (SGP) and body mass in  $\log_{10}$  at the breakpoint between RGP and SGP.

**Supplementary Table 7 | Results of *SLOUCH* analyses relating within- and among-species variance in relative brain size accounting for phylogeny**

| Predictor variables                      | Phylogenetic half-life<br>(Support Region) | Intercept $\pm$ s.e.              | Slope $\pm$ s.e.                    |                                   | $r^2$ (%)   | AICc          |
|------------------------------------------|--------------------------------------------|-----------------------------------|-------------------------------------|-----------------------------------|-------------|---------------|
| <i>(Mammalia)</i>                        |                                            |                                   |                                     |                                   |             |               |
|                                          |                                            |                                   | Root age                            | $C_{brain}$                       |             |               |
| Root age                                 | 0 (0 - $\infty$ )                          | 0.100 $\pm$ 0.026                 | 0.0006 $\pm$ 0.0005                 | -                                 | 18.7        | -18.7         |
| $C_{brain}$                              | <b>17.55 (0 - <math>\infty</math>)</b>     | <b>0.082<math>\pm</math>0.023</b> | -                                   | <b>7.52<math>\pm</math>3.44</b>   | <b>45.1</b> | <b>-20.7</b>  |
| $C_{brain}$ + Root age                   | $\infty$ (0 - $\infty$ )                   | 0.015 $\pm$ 0.023                 | 0.0009 $\pm$ 0.0003                 | 11.00 $\pm$ 2.02                  | 83.2        | -15.0         |
|                                          |                                            |                                   | Root age                            | $\Delta_{slope}$                  |             |               |
| <b>Root age</b>                          | <b>4.38 (0.82 - <math>\infty</math>)</b>   | <b>0.074<math>\pm</math>0.032</b> | <b>0.0009<math>\pm</math>0.0006</b> | -                                 | <b>18.6</b> | <b>-25.3</b>  |
| $\Delta_{slope}$                         | 0.30 (0 - $\infty$ )                       | 0.082 $\pm$ 0.059                 | -                                   | 0.061 $\pm$ 0.116                 | 3.3         | -24.1         |
| $\Delta_{slope}$ + Root age              | 4.80 (0.92 - $\infty$ )                    | 0.039 $\pm$ 0.057                 | 0.0009 $\pm$ 0.0006                 | 0.066 $\pm$ 0.094                 | 22.1        | -18.3         |
| <i>(Aves)</i>                            |                                            |                                   |                                     |                                   |             |               |
|                                          |                                            |                                   | Root age                            | $C_{brain}$                       |             |               |
| Root age                                 | 0.97 (0 - $\infty$ )                       | 0.047 $\pm$ 0.008                 | 0.0004 $\pm$ 0.0002                 | -                                 | 13.8        | -161.4        |
| $C_{brain}$                              | 9.79 (0.2 - $\infty$ )                     | 0.045 $\pm$ 0.006                 | -                                   | 3.43 $\pm$ 0.43                   | 27.4        | -166.9        |
| <b><math>C_{brain}</math> + Root age</b> | <b>9.18 (0 - <math>\infty</math>)</b>      | <b>0.034<math>\pm</math>0.008</b> | <b>0.0003<math>\pm</math>0.0001</b> | <b>3.12<math>\pm</math>0.40</b>   | <b>35.8</b> | <b>-168.2</b> |
|                                          |                                            |                                   | Root age                            | $\Delta_{slope}$                  |             |               |
| $\Delta_{slope}$                         | 2.34 (0 - $\infty$ )                       | 0.083 $\pm$ 0.007                 | -                                   | -0.050 $\pm$ 0.005                | 0.5         | -156.6        |
| $\Delta_{slope}$ + Root age              | 2.14 (0 - $\infty$ )                       | 0.085 $\pm$ 0.009                 | 0.0004 $\pm$ 0.0002                 | -0.080 $\pm$ 0.004                | 15.2        | -159.2        |
| <i>(Teleostei)</i>                       |                                            |                                   |                                     |                                   |             |               |
|                                          |                                            |                                   | Root age                            | $C_{brain}$                       |             |               |
| <b>Root age</b>                          | <b>0.15 (0 - <math>\infty</math>)</b>      | <b>0.155<math>\pm</math>0.088</b> | <b>-0.0003<math>\pm</math>0.001</b> | -                                 | <b>1.3</b>  | <b>-11.6</b>  |
| $C_{brain}$                              | 0.16 (0 - $\infty$ )                       | 0.125 $\pm$ 0.050                 | -                                   | -0.0003 $\pm$ 4.67                | 0.0         | -11.4         |
| $C_{brain}$ + Root age                   | 0.16 (0 - $\infty$ )                       | 0.170 $\pm$ 0.125                 | -0.0004 $\pm$ 0.001                 | -1.30 $\pm$ 3.36                  | 1.65        | -2.6          |
|                                          |                                            |                                   | Root age                            | $\Delta_{slope}$                  |             |               |
| <b><math>\Delta_{slope}</math></b>       | <b>0.021 (0 - <math>\infty</math>)</b>     | <b>0.067<math>\pm</math>0.016</b> | -                                   | <b>0.464<math>\pm</math>0.123</b> | <b>62.8</b> | <b>-20.6</b>  |
| $\Delta_{slope}$ + Root age              | 0.020 (0 - $\infty$ )                      | 0.056 $\pm$ 0.060                 | -0.0001 $\pm$ 0.0006                | 0.756 $\pm$ 0.084                 | 63.5        | -11.7         |

Table shows the complete results testing the relationship between  $\sqrt{V_{st}}$  and predictor variables ( $C_{brain}$ ,  $\Delta_{slope}$ , and root age). The phylogenetic half-life ( $\ln 2/\alpha$ ) in units of tree length scaled to the total height of one, intercept,  $r^2$ , sample size-corrected Akaike Information Criterion (AICc) and estimated slopes are presented. Support regions shown in parenthesis represents the range of half-life within 2 maximum-likelihood (ML) units from the ML estimates. Estimated evolutionary parameters are accounted for by standard errors in  $C_{brain}$  and  $\Delta_{slope}$ , and by the approximate 95% confidence intervals in  $\sqrt{V_{st}}$  (see Methods for detail). The best models within each nested models, based on AICc, are shown in bold font. Phylogenetic half-lives were estimated in these analyses (i.e. phylogenetic relatedness among clades are accounted for).
